# Supplementary material for: Activity of a Long-Acting Injectable Bedaquiline Formulation in a Paucibacillary Mouse Model of Latent Tuberculosis Infection
Source: PubMed Central journal article supplement (PMC6437534; doi:10.1128/aac.00007-19), 2019-03-27
Supplement: AAC.00007-19-s0001.pdf [file AAC.00007-19-s0001.pdf]

## SUPPLEMENTAL MATERIALS

**Figure S1.** *M. tuberculosis* lung CFU counts during 12 weeks of treatment.  
(Supplement Page 2)

**Table S1.** CFU count data from quantitative cultures of the bacterial suspensions used for aerosol infections.  
(Supplement Page 3)

**Table S2.** CFU count data used to calculate the number of bacteria implanted in mouse lungs following aerosol infections.  
(Supplement Page 4)

**Table S3.** CFU count data from quantitative cultures of mouse lung homogenates at Day 0.  
(Supplement Page 5)

**Table S4.** CFU count data from quantitative cultures of mouse lung homogenates at Week 4.  
(Supplement Page 6)

**Table S5.** CFU count data from quantitative cultures of mouse lung homogenates at Week 8.  
(Supplement Page 8)

**Table S6.** CFU count data from quantitative cultures of mouse lung homogenates from untreated mice at Week 12.  
(Supplement Page 11)

**Table S7.** CFU count data from quantitative cultures of mouse lung homogenates at Week 12.  
(Supplement Page 12)

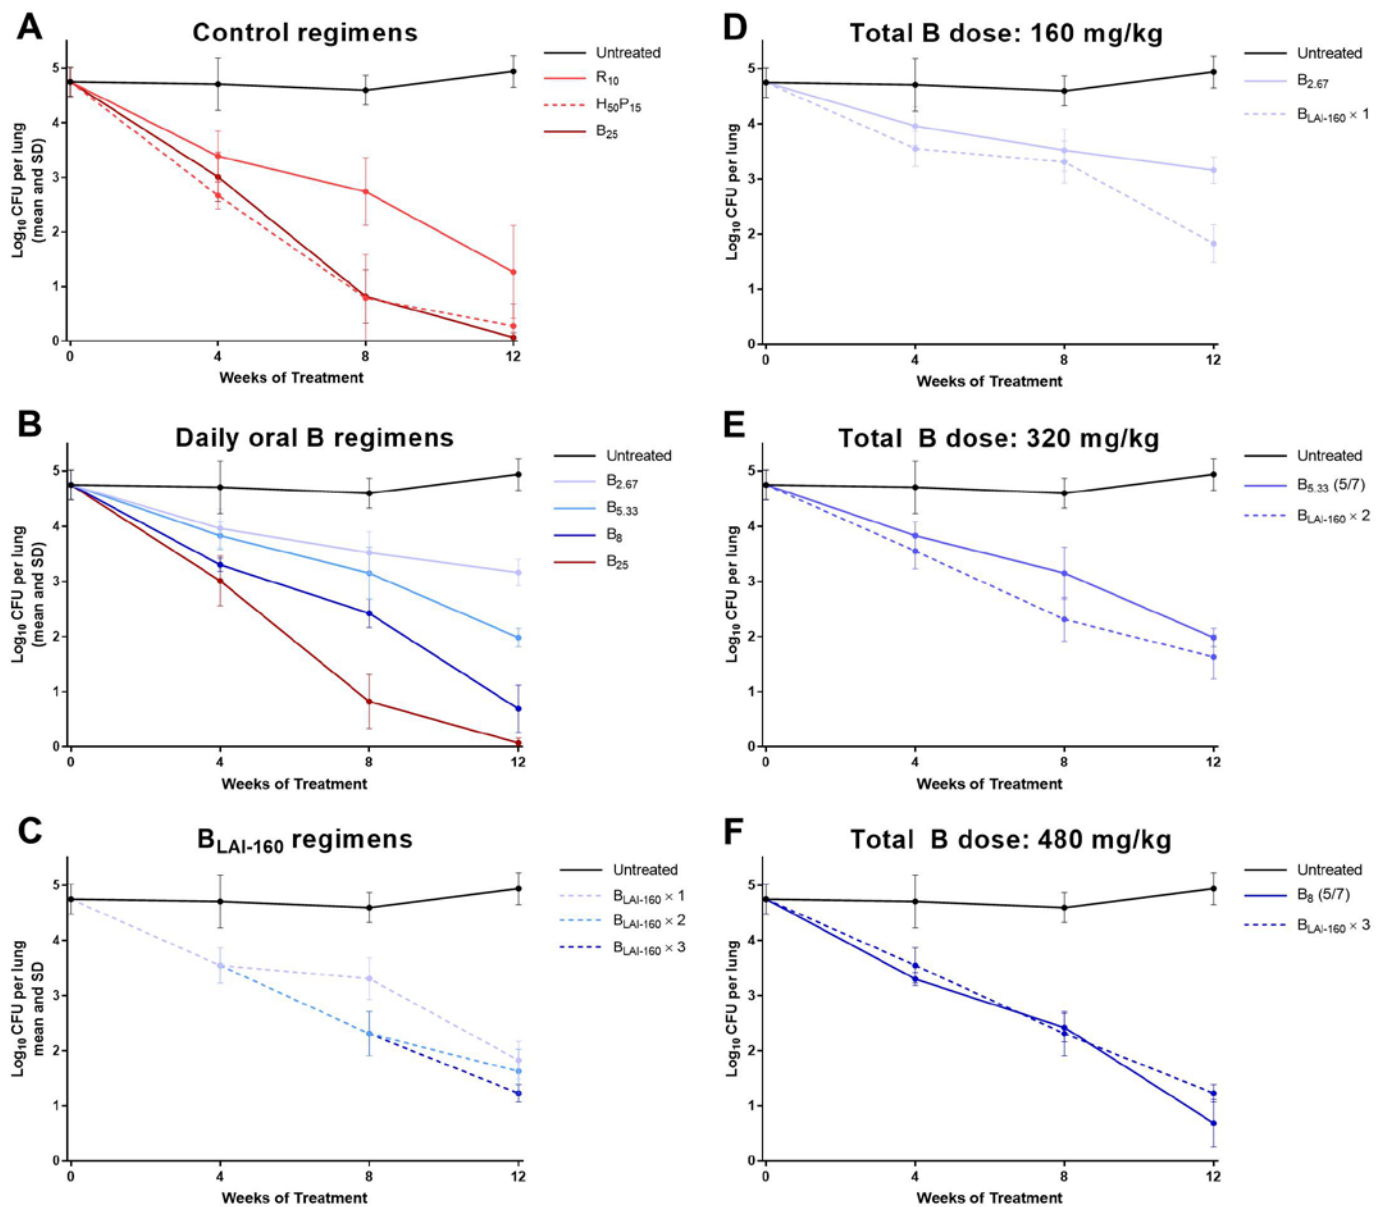

**Figure S1. *M. tuberculosis* lung CFU counts during 12 weeks of treatment.** Lung CFU data are presented for mice receiving (A) the control regimens, (B) the daily oral bedaquiline regimens, (C) the B<sub>LAI-160</sub> regimens, and total bedaquiline doses of (D) 160 mg/kg, (E) 320 mg/kg, and (F) 480 mg/kg. Data points represent mean values, and error bars represent standard deviation (n = 5 mice per group per time point) provided in **Table 3**. See **Table 2** for a description of the regimens. See **Tables S2-S7** for the raw CFU data at each time point.

**Table S1. CFU count data from quantitative cultures of the bacterial suspensions used for aerosol infections.** Serial ten-fold dilutions of the bacterial suspensions used for aerosol infections were plated on non-selective 7H11 agar (0.5 mL per agar plate). The shaded cells were used to calculate CFU/mL. The lower limits of detection were  $4.30 \log_{10}$  CFU/mL and  $1.32 \log_{10}$  CFU/mL for the *M. bovis* rBCG30 and *M. tuberculosis* H37Rv infections, respectively.

| Suspensions used for aerosol infections                                                                 | CFU counts for the following 10-fold dilutions: |     |     |   |     |     | CFU/mL    | log <sub>10</sub> CFU/mL |
|---------------------------------------------------------------------------------------------------------|-------------------------------------------------|-----|-----|---|-----|-----|-----------|--------------------------|
|                                                                                                         | 1                                               | 2   | 3   | 4 | 5   | 6   |           |                          |
| <i>M. bovis</i> rBCG30<br>OD <sub>600</sub> = 1.03, adjusted to 0.56<br>and then diluted 5-fold         | ---                                             | --- | --- | + | 38  | 4   | 7 600 000 | 6.88                     |
| <i>M. tuberculosis</i> H37Rv<br>OD <sub>600</sub> = 0.875, adjusted to 0.12<br>and then diluted 10-fold | ++                                              | +   | 27  | 3 | --- | --- | 54 000    | 4.73                     |

++ indicates non-uniform confluent growth.

+ indicates individual colonies too numerous to accurately count or estimate.

--- indicates not determined.

**Table S2. CFU count data used to calculate the number of bacteria implanted in mouse lungs following aerosol infections.** Mice were sacrificed the day after infection. Undiluted lung homogenates and serial ten-fold dilutions were cultured (0.5 mL per agar plate) on selective 7H11 agar ("plain" agar) and selective 7H11 agar supplemented with 40 µg/mL HYG or 4 µg/mL TCH. The shaded cells were used to calculate CFU/lung for each sample.

| Mouse number                                             | Agar type | CFU counts for the following 10-fold dilutions: |    |      |     | CFU/lung | Log <sub>10</sub> CFU/lung | LLOD |
|----------------------------------------------------------|-----------|-------------------------------------------------|----|------|-----|----------|----------------------------|------|
|                                                          |           | 0                                               | 1  | 2    | 3   |          |                            |      |
| <b><i>M. bovis</i> rBCG30 infection (Week -19)</b>       |           |                                                 |    |      |     |          |                            |      |
| 1                                                        | Plain     | 40                                              | 14 | 1    | --- | 700      | 2.85                       | 0.78 |
|                                                          | HYG       | 46                                              | 16 | 2    | --- | 800      | 2.90                       | 0.78 |
|                                                          | TCH       | ---                                             | 0  | ---  | --- | 0        | 0.00                       | 1.71 |
| 2                                                        | Plain     | 11                                              | 18 | 2    | --- | 900      | 2.95                       | 0.78 |
|                                                          | HYG       | 16                                              | 27 | 1    | --- | 1 350    | 3.13                       | 0.78 |
|                                                          | TCH       | ---                                             | 0  | ---  | --- | 0        | 0.00                       | 1.71 |
| 3                                                        | Plain     | 12                                              | 23 | 0    | --- | 1 150    | 3.06                       | 0.78 |
|                                                          | HYG       | 1                                               | 25 | 0    | --- | 1 250    | 3.10                       | 0.78 |
|                                                          | TCH       | ---                                             | 0  | ---  | --- | 0        | 0.00                       | 1.71 |
| 4                                                        | Plain     | 40                                              | 26 | 0    | --- | 1 300    | 3.11                       | 0.78 |
|                                                          | HYG       | 14                                              | 26 | 3    | --- | 1 300    | 3.11                       | 0.78 |
|                                                          | TCH       | ---                                             | 0  | ---  | --- | 0        | 0.00                       | 1.71 |
| 5                                                        | Plain     | 7                                               | 24 | 3    | --- | 1 200    | 3.08                       | 0.78 |
|                                                          | HYG       | 40                                              | 20 | 3    | --- | 1 000    | 3.00                       | 0.48 |
|                                                          | TCH       | ---                                             | 0  | ---  | --- | 0        | 0.00                       | 1.71 |
| <b><i>M. tuberculosis</i> H37Rv infection (Week -13)</b> |           |                                                 |    |      |     |          |                            |      |
| 1                                                        | Plain     | +                                               | +  | ~150 | 21  | 105 000  | 5.02                       | 0.78 |
|                                                          | HYG       | +                                               | +  | ~150 | 17  | 85 000   | 4.93                       | 0.78 |
|                                                          | TCH       | 24                                              | 10 | 0    | 0   | 120      | 2.08                       | 0.78 |
| 2                                                        | Plain     | +                                               | +  | ~150 | 12  | 60 000   | 4.78                       | 0.78 |
|                                                          | HYG       | +                                               | +  | ~150 | 15  | 75 000   | 4.88                       | 0.78 |
|                                                          | TCH       | 22                                              | 2  | 0    | 0   | 110      | 2.05                       | 0.78 |
| 3                                                        | Plain     | +                                               | +  | ~200 | 19  | 95 000   | 4.98                       | 0.78 |
|                                                          | HYG       | +                                               | +  | ~200 | 28  | 140 000  | 5.15                       | 0.78 |
|                                                          | TCH       | 28                                              | 1  | 0    | 0   | 140      | 2.15                       | 0.78 |
| 4                                                        | Plain     | +                                               | +  | ~150 | 10  | 50 000   | 4.70                       | 0.78 |
|                                                          | HYG       | +                                               | +  | ~150 | 17  | 85 000   | 4.93                       | 0.78 |
|                                                          | TCH       | 21                                              | 2  | 0    | 20  | 105      | 2.03                       | 0.78 |
| 5                                                        | Plain     | +                                               | +  | ~150 | 17  | 85 000   | 4.93                       | 0.78 |
|                                                          | HYG       | +                                               | +  | ~150 | 15  | 75 000   | 4.88                       | 0.78 |
|                                                          | TCH       | 35                                              | 8  | 0    | 0   | 175      | 2.25                       | 0.78 |

LLOD: lower limit of detection (log<sub>10</sub> CFU/lung).

+ indicates individual colonies too numerous to accurately count or estimate.

~ indicates that a precise CFU count could not be determined due to merged/touching colonies.

--- indicates not determined.

**Table S3. CFU count data from quantitative cultures of mouse lung homogenates at Day 0.** Mouse lungs were homogenized in 2.5 mL PBS. Undiluted lung homogenate and serial ten-fold dilutions were cultured (0.5 mL per agar plate) on selective 7H11 agar ("plain" agar) and selective 7H11 agar supplemented with 40 µg/mL HYG or 4 µg/mL TCH. The shaded cells were used to calculate CFU/lung for each sample, and the lower limit of detection was 0.78 log<sub>10</sub> CFU/lung for each sample.

| Mouse number | Agar type | CFU counts for the following 10-fold dilutions: |     |     |    |   | CFU/lung | Log <sub>10</sub> CFU/lung |
|--------------|-----------|-------------------------------------------------|-----|-----|----|---|----------|----------------------------|
|              |           | 0                                               | 1   | 2   | 3  | 4 |          |                            |
| 1            | Plain     | ++                                              | +   | 57  | 2  | 0 | 28 500   | 4.45                       |
|              | HYG       | +                                               | 44  | 1   | 0  | 0 | 2 200    | 3.34                       |
|              | TCH       | ++                                              | +   | 66  | 1  | 0 | 33 000   | 4.52                       |
| 2            | Plain     | ++                                              | +   | 146 | 9  | 1 | 45 000   | 4.65                       |
|              | HYG       | +                                               | 7   | 0   | 0  | 0 | 350      | 2.55                       |
|              | TCH       | ++                                              | +   | 188 | 13 | 2 | 65 000   | 4.81                       |
| 3            | Plain     | ++                                              | ++  | 212 | 16 | 2 | 80 000   | 4.90                       |
|              | HYG       | +                                               | 132 | 12  | 1  | 0 | 6 000    | 3.78                       |
|              | TCH       | ++                                              | ++  | 256 | 19 | 0 | 95 000   | 4.98                       |
| 4            | Plain     | ++                                              | +   | 116 | 10 | 0 | 50 000   | 4.70                       |
|              | HYG       | +                                               | 45  | 3   | 0  | 0 | 2 250    | 3.35                       |
|              | TCH       | ++                                              | +   | 122 | 11 | 0 | 55 000   | 4.74                       |
| 5            | Plain     | ++                                              | ++  | 223 | 28 | 4 | 140 000  | 5.15                       |
|              | HYG       | +                                               | 43  | 2   | 0  | 0 | 2 150    | 3.33                       |
|              | TCH       | ++                                              | ++  | 214 | 28 | 2 | 140 000  | 5.15                       |

++ indicates non-uniform confluent growth.

+ indicates individual colonies too numerous to accurately count or estimate.

**Table S4. CFU count data from quantitative cultures of mouse lung homogenates at Week 4.** Mouse lungs were homogenized in 3.0 mL PBS. Undiluted homogenates and up to three ten-fold serial dilutions of homogenates were plated (0.5 mL per agar plate) on selective 7H11 agar with charcoal (“Plain” agar) and selective 7H11 charcoal agar supplemented with 40 µg/mL HYG or 200 µg/mL TCH. The shaded cells were used to calculate CFU/lung for each sample.

| LTBI treatment regimen                | Mouse number | Agar type | CFU counts for the following 10-fold dilutions: |     |    |     | CFU/lung | Log <sub>10</sub> CFU/lung | LLOD |
|---------------------------------------|--------------|-----------|-------------------------------------------------|-----|----|-----|----------|----------------------------|------|
|                                       |              |           | 0                                               | 1   | 2  | 3   |          |                            |      |
| Untreated                             | 1            | Plain     | ---                                             | +   | 45 | 1   | 27 000   | 4.43                       | 1.79 |
|                                       |              | HYG       | ---                                             | 50  | 3  | 0   | 3 000    | 3.48                       | 1.79 |
|                                       |              | TCH       | ---                                             | +   | 33 | 4   | 19 800   | 4.30                       | 1.79 |
|                                       | 2            | Plain     | ---                                             | +   | 92 | 10  | 60 000   | 4.78                       | 1.79 |
|                                       |              | HYG       | ---                                             | 5   | 2  | 0   | 300      | 2.48                       | 1.79 |
|                                       |              | TCH       | ---                                             | +   | 66 | 8   | 39 600   | 4.60                       | 1.79 |
|                                       | 3            | Plain     | ---                                             | +   | +  | 54  | 324 000  | 5.51                       | 1.79 |
|                                       |              | HYG       | ---                                             | 112 | 13 | 1   | 7 800    | 3.89                       | 1.79 |
|                                       |              | TCH       | ---                                             | +   | +  | 50  | 300 000  | 5.48                       | 1.79 |
|                                       | 4            | Plain     | ---                                             | +   | 33 | 1   | 19 800   | 4.30                       | 1.79 |
|                                       |              | HYG       | ---                                             | 13  | 2  | 0   | 780      | 2.89                       | 1.79 |
|                                       |              | TCH       | ---                                             | +   | 26 | 1   | 15 600   | 4.19                       | 1.79 |
|                                       | 5            | Plain     | ---                                             | +   | 75 | 8   | 45 000   | 4.65                       | 1.79 |
|                                       |              | HYG       | ---                                             | 71  | 8  | 3   | 4 260    | 3.63                       | 1.79 |
|                                       |              | TCH       | ---                                             | +   | 67 | 7   | 40 200   | 4.60                       | 1.79 |
| R <sub>10</sub> (5/7)                 | 1            | Plain     | 68                                              | 11  | 1  | --- | 660      | 2.82                       | 0.85 |
|                                       |              | HYG       | 0                                               | 0   | 0  | --- | 0        | 0.00                       | 0.85 |
|                                       |              | TCH       | 56                                              | 7   | 0  | --- | 336      | 2.53                       | 0.85 |
|                                       | 2            | Plain     | +                                               | 107 | 14 | --- | 8 400    | 3.92                       | 0.85 |
|                                       |              | HYG       | 0                                               | 0   | 0  | --- | 0        | 0.00                       | 0.85 |
|                                       |              | TCH       | +                                               | 63  | 8  | --- | 3 780    | 3.58                       | 0.85 |
|                                       | 3            | Plain     | Contam.                                         | 60  | 3  | --- | 3 600    | 3.56                       | 1.79 |
|                                       |              | HYG       | 0                                               | 0   | 0  | --- | 0        | 0.00                       | 0.85 |
|                                       |              | TCH       | +                                               | 42  | 3  | --- | 2 520    | 3.40                       | 0.85 |
|                                       | 4            | Plain     | +                                               | 17  | 1  | --- | 1 020    | 3.01                       | 0.85 |
|                                       |              | HYG       | 0                                               | 0   | 0  | --- | 0        | 0.00                       | 0.85 |
|                                       |              | TCH       | +                                               | 16  | 3  | --- | 960      | 2.98                       | 0.85 |
|                                       | 5            | Plain     | +                                               | 101 | 7  | --- | 4 200    | 3.62                       | 0.85 |
|                                       |              | HYG       | 1                                               | 0   | 0  | --- | 6        | 0.85                       | 0.85 |
|                                       |              | TCH       | +                                               | 47  | 5  | --- | 2 820    | 3.45                       | 0.85 |
| H <sub>50</sub> P <sub>15</sub> (1/7) | 1            | Plain     | 97                                              | 13  | 5  | --- | 780      | 2.89                       | 0.85 |
|                                       |              | HYG       | 1                                               | 0   | 0  | --- | 6        | 0.85                       | 0.85 |
|                                       |              | TCH       | 91                                              | 8   | 0  | --- | 546      | 2.74                       | 0.85 |
|                                       | 2            | Plain     | 89                                              | 15  | 0  | --- | 900      | 2.95                       | 0.85 |
|                                       |              | HYG       | 0                                               | 0   | 0  | --- | 0        | 0.00                       | 0.85 |
|                                       |              | TCH       | 77                                              | 10  | 1  | --- | 462      | 2.67                       | 0.85 |
|                                       | 3            | Plain     | 50                                              | 6   | 0  | --- | 300      | 2.48                       | 0.85 |
|                                       |              | HYG       | 0                                               | 0   | 0  | --- | 0        | 0.00                       | 0.85 |
|                                       |              | TCH       | Contam.                                         | 3   | 0  | --- | 180      | 2.26                       | 1.79 |
|                                       | 4            | Plain     | 74                                              | 10  | 0  | --- | 444      | 2.65                       | 0.85 |
|                                       |              | HYG       | 0                                               | 0   | 0  | --- | 0        | 0.00                       | 0.85 |
|                                       |              | TCH       | 48                                              | 5   | 0  | --- | 288      | 2.46                       | 0.85 |
|                                       | 5            | Plain     | 40                                              | 1   | 0  | --- | 240      | 2.38                       | 0.85 |
|                                       |              | HYG       | 0                                               | 0   | 0  | --- | 0        | 0.00                       | 0.85 |
|                                       |              | TCH       | 29                                              | 2   | 0  | --- | 174      | 2.24                       | 0.85 |
| B <sub>25</sub> (5/7)                 | 1            | Plain     | 62                                              | 15  | 1  | --- | 372      | 2.57                       | 0.85 |
|                                       |              | HYG       | 0                                               | 0   | 0  | --- | 0        | 0.00                       | 0.85 |
|                                       |              | TCH       | 40                                              | 5   | 0  | --- | 240      | 2.38                       | 0.85 |
|                                       | 2            | Plain     | 53                                              | 6   | 2  | --- | 318      | 2.50                       | 0.85 |
|                                       |              | HYG       | 0                                               | 0   | 0  | --- | 0        | 0.00                       | 0.85 |
|                                       |              | TCH       | 28                                              | 5   | 0  | --- | 168      | 2.23                       | 0.85 |
|                                       | 3            | Plain     | 177                                             | 32  | 3  | --- | 1 920    | 3.28                       | 0.85 |
|                                       |              | HYG       | 0                                               | 0   | 0  | --- | 0        | 0.00                       | 0.85 |
|                                       |              | TCH       | 98                                              | 19  | 1  | --- | 1 140    | 3.06                       | 0.85 |
|                                       | 4            | Plain     | +                                               | 54  | 8  | --- | 3 240    | 3.51                       | 0.85 |
|                                       |              | HYG       | 2                                               | 0   | 0  | --- | 12       | 1.11                       | 0.85 |
|                                       |              | TCH       | +                                               | 38  | 2  | --- | 2 280    | 3.36                       | 0.85 |
|                                       | 5            | Plain     | 109                                             | 25  | 0  | --- | 1 500    | 3.18                       | 0.85 |
|                                       |              | HYG       | 1                                               | 0   | 0  | --- | 6        | 0.85                       | 0.85 |
|                                       |              | TCH       | +                                               | 19  | 1  | --- | 1 140    | 3.06                       | 0.85 |

Continued on next page.

**Table S4, continued.**

| LTBI treatment regimen          | Mouse number            | Agar type | CFU counts for the following 10-fold dilutions: |         |    |     | CFU/lung | Log <sub>10</sub> CFU/lung | LLOD |      |
|---------------------------------|-------------------------|-----------|-------------------------------------------------|---------|----|-----|----------|----------------------------|------|------|
|                                 |                         |           | 0                                               | 1       | 2  | 3   |          |                            |      |      |
| B <sub>8</sub> (5/7)            | 1                       | Plain     | +                                               | 35      | 1  | 0   | 2 100    | 3.32                       | 0.85 |      |
|                                 |                         | HYG       | 0                                               | 0       | 0  | 0   | 0        | 0.00                       | 0.85 |      |
|                                 |                         | TCH       | +                                               | 18      | 0  | 0   | 1 080    | 3.03                       | 0.85 |      |
|                                 | 2                       | Plain     | +                                               | 27      | 3  | 0   | 1 620    | 3.21                       | 0.85 |      |
|                                 |                         | HYG       | 0                                               | 0       | 0  | 0   | 0        | 0.00                       | 0.85 |      |
|                                 |                         | TCH       | 83                                              | 14      | 1  | 0   | 498      | 2.70                       | 0.85 |      |
|                                 | 3                       | Plain     | 120                                             | 26      | 0  | 0   | 1 560    | 3.19                       | 0.85 |      |
|                                 |                         | HYG       | 1                                               | 0       | 0  | 0   | 6        | 0.85                       | 0.85 |      |
|                                 |                         | TCH       | 88                                              | 6       | 0  | 0   | 528      | 2.72                       | 0.85 |      |
|                                 | 4                       | Plain     | +                                               | 52      | 8  | 0   | 3 120    | 3.49                       | 0.85 |      |
|                                 |                         | HYG       | 0                                               | 0       | 0  | 0   | 0        | 0.00                       | 0.85 |      |
|                                 |                         | TCH       | +                                               | 34      | 4  | --- | 2 040    | 3.31                       | 0.85 |      |
|                                 | 5                       | Plain     | +                                               | 33      | 0  | 0   | 1 980    | 3.30                       | 0.85 |      |
|                                 |                         | HYG       | 0                                               | 0       | 0  | 0   | 0        | 0.00                       | 0.85 |      |
|                                 |                         | TCH       | +                                               | 13      | 2  | 0   | 780      | 2.89                       | 0.85 |      |
| B <sub>5.33</sub> (5/7)         | 1                       | Plain     | +                                               | 65      | 5  | 1   | 3 900    | 3.59                       | 0.85 |      |
|                                 |                         | HYG       | 0                                               | 0       | 0  | 0   | 0        | 0.00                       | 0.85 |      |
|                                 |                         | TCH       | +                                               | 29      | 3  | 0   | 1 740    | 3.24                       | 0.85 |      |
|                                 | 2                       | Plain     | +                                               | 88      | 11 | 0   | 5 280    | 3.72                       | 0.85 |      |
|                                 |                         | HYG       | 3                                               | 0       | 0  | 0   | 18       | 1.28                       | 0.85 |      |
|                                 |                         | TCH       | +                                               | 45      | 5  | 0   | 2 700    | 3.43                       | 0.85 |      |
|                                 | 3                       | Plain     | +                                               | 165     | 28 | 2   | 16 800   | 4.23                       | 0.85 |      |
|                                 |                         | HYG       | 5                                               | 2       | 0  | 0   | 30       | 1.49                       | 0.85 |      |
|                                 |                         | TCH       | +                                               | 72      | 7  | 3   | 4 320    | 3.64                       | 0.85 |      |
|                                 | 4                       | Plain     | +                                               | 97      | 14 | 0   | 8 400    | 3.92                       | 0.85 |      |
|                                 |                         | HYG       | 1                                               | 0       | 0  | 0   | 6        | 0.85                       | 0.85 |      |
|                                 |                         | TCH       | +                                               | 42      | 6  | 0   | 2 520    | 3.40                       | 0.85 |      |
|                                 | 5                       | Plain     | +                                               | 79      | 9  | 0   | 4 740    | 3.68                       | 0.85 |      |
|                                 |                         | HYG       | 2                                               | 0       | 0  | 0   | 12       | 1.11                       | 0.85 |      |
|                                 |                         | TCH       | +                                               | 31      | 4  | 0   | 1 860    | 3.27                       | 0.85 |      |
|                                 | B <sub>2.67</sub> (5/7) | 1         | Plain                                           | +       | 71 | 5   | 0        | 4 260                      | 3.63 | 0.85 |
|                                 |                         |           | HYG                                             | 0       | 0  | 0   | 0        | 0                          | 0.00 | 0.85 |
|                                 |                         |           | TCH                                             | Contam. | 57 | 7   | 1        | 3 420                      | 3.53 | 1.79 |
| 2                               |                         | Plain     | +                                               | +       | 54 | 1   | 32 400   | 4.51                       | 0.85 |      |
|                                 |                         | HYG       | 37                                              | 4       | 0  | 0   | 222      | 2.35                       | 0.85 |      |
|                                 |                         | TCH       | +                                               | +       | 30 | 1   | 18 000   | 4.26                       | 0.85 |      |
| 3                               |                         | Plain     | +                                               | 92      | 17 | 1   | 10 200   | 4.01                       | 0.85 |      |
|                                 |                         | HYG       | 12                                              | 3       | 0  | 0   | 72       | 1.86                       | 0.85 |      |
|                                 |                         | TCH       | +                                               | 73      | 10 | 0   | 4 380    | 3.64                       | 0.85 |      |
| 4                               |                         | Plain     | +                                               | 77      | 12 | 0   | 4 620    | 3.66                       | 0.85 |      |
|                                 |                         | HYG       | 2                                               | 1       | 0  | 0   | 12       | 1.11                       | 0.85 |      |
|                                 |                         | TCH       | +                                               | 30      | 7  | 0   | 1 800    | 3.26                       | 0.85 |      |
| 5                               |                         | Plain     | +                                               | 113     | 17 | 0   | 10 200   | 4.01                       | 0.85 |      |
|                                 |                         | HYG       | 7                                               | 0       | 0  | 0   | 42       | 1.63                       | 0.85 |      |
|                                 |                         | TCH       | +                                               | 81      | 6  | 0   | 4 860    | 3.69                       | 0.85 |      |
| B <sub>LAI-160</sub> (1/28) × 1 | 1                       | Plain     | +                                               | 124     | 15 | 1   | 9 000    | 3.95                       | 0.85 |      |
|                                 |                         | HYG       | 0                                               | 0       | 0  | 0   | 0        | 0.00                       | 0.85 |      |
|                                 |                         | TCH       | +                                               | 71      | 5  | 0   | 4 260    | 3.63                       | 0.85 |      |
|                                 | 2                       | Plain     | +                                               | 31      | 3  | 0   | 1 860    | 3.27                       | 0.85 |      |
|                                 |                         | HYG       | 0                                               | 0       | 0  | 0   | 0        | 0.00                       | 0.85 |      |
|                                 |                         | TCH       | 42                                              | 9       | 2  | 0   | 540      | 2.73                       | 0.85 |      |
|                                 | 3                       | Plain     | +                                               | 74      | 6  | 0   | 4 440    | 3.65                       | 0.85 |      |
|                                 |                         | HYG       | 0                                               | 0       | 0  | 0   | 0        | 0.00                       | 0.85 |      |
|                                 |                         | TCH       | +                                               | 44      | 3  | 0   | 2 640    | 3.42                       | 0.85 |      |
|                                 | 4                       | Plain     | +                                               | 26      | 6  | 0   | 1 560    | 3.19                       | 0.85 |      |
|                                 |                         | HYG       | 2                                               | 0       | 0  | 0   | 12       | 1.11                       | 0.85 |      |
|                                 |                         | TCH       | +                                               | 25      | 1  | 0   | 1 500    | 3.18                       | 0.85 |      |
|                                 | 5                       | Plain     | +                                               | 81      | 8  | 2   | 4 860    | 3.69                       | 0.85 |      |
|                                 |                         | HYG       | 1                                               | 0       | 0  | 0   | 6        | 0.85                       | 0.85 |      |
|                                 |                         | TCH       | +                                               | 37      | 5  | 1   | 2 220    | 3.35                       | 0.85 |      |

LLOD: lower limit of detection (log<sub>10</sub> CFU/lung).

Contam. indicates bacterial or fungal contamination; this plate was not used to calculate CFU/lung.

+ indicates individual colonies too numerous to accurately count or estimate.

--- indicates not determined.

**Table S5. CFU count data from quantitative cultures of mouse lung homogenates at Week 8.** Mouse lungs were homogenized in 3.0 mL PBS. Undiluted homogenates and up to three ten-fold serial dilutions of homogenates were plated (0.5 mL per agar plate) on selective 7H11 agar with charcoal (“Plain” agar) and selective 7H11 charcoal agar supplemented with 40 µg/mL HYG or 200 µg/mL TCH. The shaded cells were used to calculate CFU/lung for each sample.

| LTBI treatment regimen                | Mouse number | Agar type | CFU counts for the following 10-fold dilutions: |         |         |     | CFU/lung | Log <sub>10</sub> CFU/lung | LLOD |
|---------------------------------------|--------------|-----------|-------------------------------------------------|---------|---------|-----|----------|----------------------------|------|
|                                       |              |           | 0                                               | 1       | 2       | 3   |          |                            |      |
| Untreated                             | 1            | Plain     | ---                                             | +       | 49      | 3   | 29 400   | 4.47                       | 1.79 |
|                                       |              | HYG       | ---                                             | 58      | 4       | 0   | 3 480    | 3.54                       | 1.79 |
|                                       |              | TCH       | ---                                             | +       | 47      | 3   | 28 200   | 4.45                       | 1.79 |
|                                       | 2            | Plain     | ---                                             | +       | 77      | 6   | 46 200   | 4.66                       | 1.79 |
|                                       |              | HYG       | ---                                             | 32      | 2       | 0   | 1 920    | 3.28                       | 1.79 |
|                                       |              | TCH       | ---                                             | +       | 79      | 4   | 47 400   | 4.68                       | 1.79 |
|                                       | 3            | Plain     | ---                                             | +       | 239     | 22  | 132 000  | 5.12                       | 1.79 |
|                                       |              | HYG       | ---                                             | +       | 30      | 4   | 18 000   | 4.26                       | 1.79 |
|                                       |              | TCH       | ---                                             | +       | 221     | 21  | 126 000  | 5.10                       | 1.79 |
|                                       | 4            | Plain     | ---                                             | +       | 49      | 4   | 29 400   | 4.47                       | 1.79 |
|                                       |              | HYG       | ---                                             | 52      | 3       | 1   | 3 120    | 3.49                       | 1.79 |
|                                       |              | TCH       | ---                                             | +       | 50      | 1   | 30 000   | 4.48                       | 1.79 |
|                                       | 5            | Plain     | ---                                             | +       | 50      | 5   | 30 000   | 4.48                       | 1.79 |
|                                       |              | HYG       | ---                                             | 10      | 0       | 0   | 600      | 2.78                       | 1.79 |
|                                       |              | TCH       | ---                                             | +       | 32      | 0   | 19 200   | 4.28                       | 1.79 |
| R <sub>10</sub> (5/7)                 | 1            | Plain     | 123                                             | 14      | 0       | --- | 840      | 2.92                       | 0.85 |
|                                       |              | HYG       | 0                                               | 0       | 0       | --- | 0        | 0.00                       | 0.85 |
|                                       |              | TCH       | 128                                             | 7       | 1       | --- | 420      | 2.62                       | 0.85 |
|                                       | 2            | Plain     | 7                                               | 0       | 0       | --- | 42       | 1.63                       | 0.85 |
|                                       |              | HYG       | 0                                               | 0       | 0       | --- | 0        | 0.00                       | 0.85 |
|                                       |              | TCH       | Contam.                                         | 0       | 0       | --- | ---      | ---                        | 1.79 |
|                                       | 3            | Plain     | 104                                             | 15      | 0       | --- | 900      | 2.95                       | 0.85 |
|                                       |              | HYG       | 0                                               | 0       | 0       | --- | 0        | 0.00                       | 0.85 |
|                                       |              | TCH       | Contam.                                         | Contam. | Contam. | --- | ---      | ---                        | ---  |
|                                       | 4            | Plain     | 135                                             | 23      | 0       | --- | 1 380    | 3.14                       | 0.85 |
|                                       |              | HYG       | 0                                               | 0       | 0       | --- | 0        | 0.00                       | 0.85 |
|                                       |              | TCH       | 173                                             | 26      | 2       | --- | 1 560    | 3.19                       | 0.85 |
|                                       | 5            | Plain     | 113                                             | 18      | 2       | --- | 1 080    | 3.03                       | 0.85 |
|                                       |              | HYG       | 0                                               | 0       | 0       | --- | 0        | 0.00                       | 0.85 |
|                                       |              | TCH       | 112                                             | 10      | 0       | --- | 600      | 2.78                       | 0.85 |
| H <sub>50</sub> P <sub>15</sub> (1/7) | 1            | Plain     | 11                                              | 0       | 0       | --- | 66       | 1.83                       | 0.85 |
|                                       |              | HYG       | 0                                               | 0       | 0       | --- | 0        | 0.00                       | 0.85 |
|                                       |              | TCH       | Contam.                                         | 0       | 0       | --- | ---      | ---                        | 1.79 |
|                                       | 2            | Plain     | 3                                               | 0       | 0       | --- | 18       | 1.28                       | 0.85 |
|                                       |              | HYG       | 0                                               | 0       | 0       | --- | 0        | 0.00                       | 0.85 |
|                                       |              | TCH       | Contam.                                         | Contam. | 0       | --- | ---      | ---                        | 2.78 |
|                                       | 3            | Plain     | 0                                               | 0       | 0       | --- | 0        | 0.00                       | 0.85 |
|                                       |              | HYG       | 0                                               | 0       | 0       | --- | 0        | 0.00                       | 0.85 |
|                                       |              | TCH       | 0                                               | 0       | 0       | --- | 0        | 0.00                       | 0.85 |
|                                       | 4            | Plain     | 0                                               | 0       | 0       | --- | 0        | 0.00                       | 0.85 |
|                                       |              | HYG       | 0                                               | 0       | 0       | --- | 0        | 0.00                       | 0.85 |
|                                       |              | TCH       | 0                                               | 0       | 0       | --- | 0        | 0.00                       | 0.85 |
|                                       | 5            | Plain     | 1                                               | 0       | 0       | --- | 6        | 0.85                       | 0.85 |
|                                       |              | HYG       | 0                                               | 0       | 0       | --- | 0        | 0.00                       | 0.85 |
|                                       |              | TCH       | 0                                               | 0       | 0       | --- | 0        | 0.00                       | 0.85 |

Continued on next page.



**Table S5, continued.**

| LTBI treatment regimen  | Mouse number | Agar type | CFU counts for the following 10-fold dilutions: |    |   |     | CFU/lung | Log <sub>10</sub> CFU/lung | LLOD |
|-------------------------|--------------|-----------|-------------------------------------------------|----|---|-----|----------|----------------------------|------|
|                         |              |           | 0                                               | 1  | 2 | 3   |          |                            |      |
| B <sub>25</sub> (5/7)   | 1            | Plain     | 3                                               | 0  | 0 | --- | 18       | 1.28                       | 0.85 |
|                         |              | HYG       | 0                                               | 0  | 0 | --- | 0        | 0.00                       | 0.85 |
|                         |              | TCH       | 4                                               | 0  | 0 | --- | 24       | 1.40                       | 0.85 |
|                         | 2            | Plain     | 1                                               | 0  | 0 | --- | 6        | 0.85                       | 0.85 |
|                         |              | HYG       | 0                                               | 0  | 0 | --- | 0        | 0.00                       | 0.85 |
|                         |              | TCH       | 3                                               | 0  | 0 | --- | 18       | 1.28                       | 0.85 |
|                         | 3            | Plain     | 1                                               | 0  | 0 | --- | 6        | 0.85                       | 0.85 |
|                         |              | HYG       | 0                                               | 0  | 0 | --- | 0        | 0.00                       | 0.85 |
|                         |              | TCH       | 0                                               | 0  | 0 | --- | 0        | 0.00                       | 0.85 |
|                         | 4            | Plain     | 2                                               | 1  | 0 | --- | 12       | 1.11                       | 0.85 |
|                         |              | HYG       | 0                                               | 0  | 0 | --- | 0        | 0.00                       | 0.85 |
|                         |              | TCH       | 0                                               | 0  | 0 | --- | 0        | 0.00                       | 0.85 |
|                         | 5            | Plain     | 0                                               | 0  | 0 | --- | 0        | 0.00                       | 0.85 |
|                         |              | HYG       | 0                                               | 0  | 0 | --- | 0        | 0.00                       | 0.85 |
|                         |              | TCH       | 0                                               | 0  | 0 | --- | 0        | 0.00                       | 0.85 |
| B <sub>8</sub> (5/7)    | 1            | Plain     | 16                                              | 1  | 0 | 0   | 96       | 1.99                       | 0.85 |
|                         |              | HYG       | 0                                               | 0  | 0 | 0   | 0        | 0.00                       | 0.85 |
|                         |              | TCH       | 10                                              | 1  | 0 | 0   | 60       | 1.79                       | 0.85 |
|                         | 2            | Plain     | 73                                              | 16 | 1 | 0   | 438      | 2.64                       | 0.85 |
|                         |              | HYG       | 0                                               | 0  | 0 | 0   | 0        | 0.00                       | 0.85 |
|                         |              | TCH       | 69                                              | 6  | 0 | 0   | 414      | 2.62                       | 0.85 |
|                         | 3            | Plain     | 61                                              | 4  | 4 | 0   | 366      | 2.56                       | 0.85 |
|                         |              | HYG       | 0                                               | 0  | 0 | 0   | 0        | 0.00                       | 0.85 |
|                         |              | TCH       | 37                                              | 6  | 0 | 0   | 222      | 2.35                       | 0.85 |
|                         | 4            | Plain     | 53                                              | 8  | 0 | 0   | 318      | 2.50                       | 0.85 |
|                         |              | HYG       | 0                                               | 0  | 0 | 0   | 0        | 0.00                       | 0.85 |
|                         |              | TCH       | 32                                              | 3  | 0 | 0   | 192      | 2.29                       | 0.85 |
|                         | 5            | Plain     | 42                                              | 7  | 1 | 0   | 252      | 2.40                       | 0.85 |
|                         |              | HYG       | 0                                               | 0  | 0 | 0   | 0        | 0.00                       | 0.85 |
|                         |              | TCH       | 31                                              | 1  | 0 | 0   | 186      | 2.27                       | 0.85 |
| B <sub>5.33</sub> (5/7) | 1            | Plain     | 109                                             | 13 | 0 | 0   | 780      | 2.89                       | 0.85 |
|                         |              | HYG       | 0                                               | 0  | 0 | 0   | 0        | 0.00                       | 0.85 |
|                         |              | TCH       | 48                                              | 9  | 0 | 0   | 288      | 2.46                       | 0.85 |
|                         | 2            | Plain     | +                                               | 65 | 8 | 2   | 3 900    | 3.59                       | 0.85 |
|                         |              | HYG       | 0                                               | 0  | 0 | 0   | 0        | 0.00                       | 0.85 |
|                         |              | TCH       | Contam.                                         | 40 | 1 | 0   | 2 400    | 3.38                       | 1.79 |
|                         | 3            | Plain     | +                                               | 77 | 9 | 0   | 4 620    | 3.66                       | 0.85 |
|                         |              | HYG       | 0                                               | 0  | 0 | 0   | 0        | 0.00                       | 0.85 |
|                         |              | TCH       | 98                                              | 19 | 2 | 0   | 1 140    | 3.06                       | 0.85 |
|                         | 4            | Plain     | 64                                              | 12 | 0 | 0   | 384      | 2.59                       | 0.85 |
|                         |              | HYG       | 0                                               | 0  | 0 | 0   | 0        | 0.00                       | 0.85 |
|                         |              | TCH       | 29                                              | 3  | 0 | 0   | 174      | 2.24                       | 0.85 |
|                         | 5            | Plain     | 101                                             | 17 | 2 | 0   | 1 020    | 3.01                       | 0.85 |
|                         |              | HYG       | 1                                               | 0  | 0 | 0   | 6        | 0.85                       | 0.85 |
|                         |              | TCH       | 60                                              | 11 | 2 | 0   | 360      | 2.56                       | 0.85 |

Continued on next page.

**Table S5, continued.**

| LTBI treatment regimen          | Mouse number | Agar type | CFU counts for the following 10-fold dilutions: |     |    |   | CFU/lung | Log <sub>10</sub> CFU/lung | LLOD |
|---------------------------------|--------------|-----------|-------------------------------------------------|-----|----|---|----------|----------------------------|------|
|                                 |              |           | 0                                               | 1   | 2  | 3 |          |                            |      |
| B <sub>2.67</sub> (5/7)         | 1            | Plain     | +                                               | 84  | 8  | 0 | 5 040    | 3.70                       | 0.85 |
|                                 |              | HYG       | 6                                               | 0   | 0  | 0 | 36       | 1.57                       | 0.85 |
|                                 |              | TCH       | +                                               | 56  | 2  | 0 | 3 360    | 3.53                       | 0.85 |
|                                 | 2            | Plain     | +                                               | 126 | 15 | 1 | 9 000    | 3.95                       | 0.85 |
|                                 |              | HYG       | 14                                              | 2   | 0  | 0 | 84       | 1.93                       | 0.85 |
|                                 |              | TCH       | +                                               | 81  | 10 | 0 | 4 860    | 3.69                       | 0.85 |
|                                 | 3            | Plain     | +                                               | 87  | 9  | 0 | 5 220    | 3.72                       | 0.85 |
|                                 |              | HYG       | 1                                               | 0   | 0  | 0 | 6        | 0.85                       | 0.85 |
|                                 |              | TCH       | +                                               | 33  | 3  | 0 | 1 980    | 3.30                       | 0.85 |
|                                 | 4            | Plain     | +                                               | 18  | 4  | 0 | 1 080    | 3.03                       | 0.85 |
|                                 |              | HYG       | 4                                               | 0   | 0  | 0 | 24       | 1.40                       | 0.85 |
|                                 |              | TCH       | 61                                              | 20  | 3  | 0 | 366      | 2.56                       | 0.85 |
|                                 | 5            | Plain     | +                                               | 28  | 1  | 1 | 1 680    | 3.23                       | 0.85 |
|                                 |              | HYG       | 0                                               | 0   | 0  | 0 | 0        | 0.00                       | 0.85 |
|                                 |              | TCH       | 103                                             | 11  | 0  | 0 | 660      | 2.82                       | 0.85 |
| B <sub>LAI-160</sub> (1/28) × 2 | 1            | Plain     | 13                                              | 3   | 0  | 0 | 78       | 1.90                       | 0.85 |
|                                 |              | HYG       | 0                                               | 0   | 0  | 0 | 0        | 0.00                       | 0.85 |
|                                 |              | TCH       | 8                                               | 0   | 0  | 0 | 48       | 1.69                       | 0.85 |
|                                 | 2            | Plain     | 34                                              | 3   | 1  | 0 | 204      | 2.31                       | 0.85 |
|                                 |              | HYG       | 0                                               | 0   | 0  | 0 | 0        | 0.00                       | 0.85 |
|                                 |              | TCH       | 19                                              | 1   | 0  | 0 | 114      | 2.06                       | 0.85 |
|                                 | 3            | Plain     | 16                                              | 1   | 0  | 0 | 96       | 1.99                       | 0.85 |
|                                 |              | HYG       | 0                                               | 0   | 0  | 0 | 0        | 0.00                       | 0.85 |
|                                 |              | TCH       | 8                                               | 0   | 0  | 0 | 48       | 1.69                       | 0.85 |
|                                 | 4            | Plain     | 50                                              | 7   | 1  | 0 | 300      | 2.48                       | 0.85 |
|                                 |              | HYG       | 0                                               | 0   | 0  | 0 | 0        | 0.00                       | 0.85 |
|                                 |              | TCH       | 31                                              | 2   | 1  | 0 | 186      | 2.27                       | 0.85 |
|                                 | 5            | Plain     | Contam.                                         | 13  | 0  | 0 | 780      | 2.89                       | 1.79 |
|                                 |              | HYG       | 0                                               | 0   | 0  | 0 | 0        | 0.00                       | 0.85 |
|                                 |              | TCH       | Contam.                                         | 21  | 1  | 1 | 1 260    | 3.10                       | 1.79 |
| B <sub>LAI-160</sub> (1/28) × 1 | 1            | Plain     | 99                                              | 7   | 1  | 0 | 594      | 2.77                       | 0.85 |
|                                 |              | HYG       | 1                                               | 0   | 0  | 0 | 6        | 0.85                       | 0.85 |
|                                 |              | TCH       | 65                                              | 13  | 0  | 0 | 390      | 2.59                       | 0.85 |
|                                 | 2            | Plain     | +                                               | 48  | 7  | 0 | 2 880    | 3.46                       | 0.85 |
|                                 |              | HYG       | 0                                               | 0   | 0  | 0 | 0        | 0.00                       | 0.85 |
|                                 |              | TCH       | +                                               | 35  | 5  | 0 | 2 100    | 3.32                       | 0.85 |
|                                 | 3            | Plain     | +                                               | 81  | 7  | 1 | 4 860    | 3.69                       | 0.85 |
|                                 |              | HYG       | 12                                              | 2   | 0  | 0 | 72       | 1.86                       | 0.85 |
|                                 |              | TCH       | +                                               | 69  | 7  | 0 | 4 140    | 3.62                       | 0.85 |
|                                 | 4            | Plain     | 109                                             | 20  | 1  | 0 | 1 200    | 3.08                       | 0.85 |
|                                 |              | HYG       | 0                                               | 0   | 0  | 0 | 0        | 0.00                       | 0.85 |
|                                 |              | TCH       | 93                                              | 19  | 1  | 0 | 1 140    | 3.06                       | 0.85 |
|                                 | 5            | Plain     | +                                               | 63  | 4  | 0 | 3 780    | 3.58                       | 0.85 |
|                                 |              | HYG       | 0                                               | 0   | 0  | 0 | 0        | 0.00                       | 0.85 |
|                                 |              | TCH       | +                                               | 22  | 3  | 0 | 1 320    | 3.12                       | 0.85 |

LLOD: lower limit of detection (log<sub>10</sub> CFU/lung).

Contam. indicates bacterial or fungal contamination; this plate was not used to calculate CFU/lung.

+ indicates individual colonies too numerous to accurately count or estimate.

--- indicates not determined.

**Table S6. CFU count data from quantitative cultures of mouse lung homogenates from untreated mice at Week 12.** Mouse lungs were homogenized in 3.0 mL PBS. Four ten-fold serial dilutions of lung homogenates were plated (0.5 mL per agar plate) on selective 7H11 agar with charcoal (“Plain” agar) and selective 7H11 charcoal agar supplemented with 40 µg/mL HYG or 200 µg/mL TCH. The shaded cells were used to calculate CFU/lung for each sample.

| Mouse number | Agar type | CFU counts for the following 10-fold dilutions: |         |    |   | CFU/lung | Log <sub>10</sub> CFU/lung | LLOD |
|--------------|-----------|-------------------------------------------------|---------|----|---|----------|----------------------------|------|
|              |           | 1                                               | 2       | 3  | 4 |          |                            |      |
| 1            | Plain     | +                                               | 190     | 27 | 2 | 162 000  | 5.21                       | 1.79 |
|              | HYG       | 17                                              | 3       | 0  | 0 | 1 020    | 3.01                       | 1.79 |
|              | TCH       | +                                               | 187     | 25 | 1 | 150 000  | 5.18                       | 1.79 |
| 2            | Plain     | +                                               | 130     | 11 | 1 | 66 000   | 4.82                       | 1.79 |
|              | HYG       | 57                                              | 8       | 1  | 0 | 3 420    | 3.53                       | 1.79 |
|              | TCH       | +                                               | 137     | 9  | 4 | 54 000   | 4.73                       | 1.79 |
| 3            | Plain     | Contam.                                         | Contam. | 10 | 1 | 60 000   | 4.78                       | 3.78 |
|              | HYG       | 27                                              | 3       | 1  | 0 | 1 620    | 3.21                       | 1.79 |
|              | TCH       | +                                               | 97      | 7  | 1 | 42 000   | 4.62                       | 1.79 |
| 4            | Plain     | ++                                              | 300     | 32 | 3 | 192 000  | 5.28                       | 1.79 |
|              | HYG       | 3                                               | 0       | 0  | 0 | 180      | 2.26                       | 1.79 |
|              | TCH       | ++                                              | +       | 31 | 2 | 186 000  | 5.27                       | 1.79 |
| 5            | Plain     | +                                               | 76      | 7  | 0 | 45 600   | 4.66                       | 1.79 |
|              | HYG       | 37                                              | 3       | 0  | 0 | 2 220    | 3.35                       | 1.79 |
|              | TCH       | +                                               | 53      | 4  | 0 | 31 800   | 4.50                       | 1.79 |

LLOD: lower limit of detection (log<sub>10</sub> CFU/lung).

Contam. indicates bacterial or fungal contamination; this plate was not used to calculate CFU/lung.

++ indicates non-uniform confluent growth.

+ indicates individual colonies too numerous to accurately count or estimate.

**Table S7. CFU count data from quantitative cultures of mouse lung homogenates at Week 12.** Mouse lungs were homogenized in 3.0 mL PBS. Undiluted homogenates and up to two ten-fold serial dilutions of homogenates were plated (0.5 mL per agar plate) on selective 7H11 agar with charcoal (“Plain” agar) and selective 7H11 charcoal agar supplemented with 40 µg/mL HYG or 200 µg/mL TCH. The shaded cells were used to calculate CFU/lung for each sample.

| LTBI treatment regimen                | Mouse number | Agar type | CFU counts for the following 10-fold dilutions: |         |         |         |     |     | CFU/lung | Log <sub>10</sub> CFU/lung | LLOD |
|---------------------------------------|--------------|-----------|-------------------------------------------------|---------|---------|---------|-----|-----|----------|----------------------------|------|
|                                       |              |           | Undiluted                                       |         |         |         | 1   | 2   |          |                            |      |
|                                       |              |           | Plate 1                                         | Plate 2 | Plate 3 | Plate 4 |     |     |          |                            |      |
| R <sub>10</sub> (5/7)                 | 1            | Plain     | 0                                               | 1       | 1       | 0       | 0   | --- | 4        | 0.68                       | 0.40 |
|                                       |              | HYG       | 0                                               | ---     | ---     | ---     | 0   | --- | 0        | 0.00                       | 0.85 |
|                                       |              | TCH       | ---                                             | ---     | ---     | ---     | --- | --- | ---      | ---                        | ---  |
|                                       | 2            | Plain     | 0                                               | 2       | 1       | 0       | 0   | --- | 6        | 0.82                       | 0.40 |
|                                       |              | HYG       | 0                                               | ---     | ---     | ---     | 0   | --- | 0        | 0.00                       | 0.85 |
|                                       |              | TCH       | ---                                             | ---     | ---     | ---     | --- | --- | ---      | ---                        | ---  |
|                                       | 3            | Plain     | 78                                              | 69      | 81      | 65      | 10  | --- | 549      | 2.74                       | 0.40 |
|                                       |              | HYG       | 0                                               | ---     | ---     | ---     | 0   | --- | 0        | 0.00                       | 0.85 |
|                                       |              | TCH       | ---                                             | ---     | ---     | ---     | --- | --- | ---      | ---                        | ---  |
|                                       | 4            | Plain     | 2                                               | 2       | 5       | 1       | 0   | --- | 19       | 1.30                       | 0.40 |
|                                       |              | HYG       | 0                                               | ---     | ---     | ---     | 0   | --- | 0        | 0.00                       | 0.85 |
|                                       |              | TCH       | ---                                             | ---     | ---     | ---     | --- | --- | ---      | ---                        | ---  |
|                                       | 5            | Plain     | 0                                               | 1       | 1       | 1       | 0   | --- | 6        | 0.82                       | 0.40 |
|                                       |              | HYG       | 0                                               | ---     | ---     | ---     | 0   | --- | 0        | 0.00                       | 0.85 |
|                                       |              | TCH       | ---                                             | ---     | ---     | ---     | --- | --- | ---      | ---                        | ---  |
| H <sub>50</sub> P <sub>15</sub> (1/7) | 1            | Plain     | 0                                               | 0       | Contam. | Contam. | 0   | --- | 0        | 0.00                       | 0.60 |
|                                       |              | HYG       | 0                                               | ---     | ---     | ---     | 0   | --- | 0        | 0.00                       | 0.85 |
|                                       |              | TCH       | ---                                             | ---     | ---     | ---     | --- | --- | ---      | ---                        | ---  |
|                                       | 2            | Plain     | 0                                               | 0       | 0       | 0       | 0   | --- | 0        | 0.00                       | 0.40 |
|                                       |              | HYG       | 0                                               | ---     | ---     | ---     | 0   | --- | 0        | 0.00                       | 0.85 |
|                                       |              | TCH       | ---                                             | ---     | ---     | ---     | --- | --- | ---      | ---                        | ---  |
|                                       | 3            | Plain     | 1                                               | 0       | 0       | 0       | 0   | --- | 2        | 0.46                       | 0.40 |
|                                       |              | HYG       | 0                                               | ---     | ---     | ---     | 0   | --- | 0        | 0.00                       | 0.85 |
|                                       |              | TCH       | ---                                             | ---     | ---     | ---     | --- | --- | ---      | ---                        | ---  |
|                                       | 4            | Plain     | 0                                               | 0       | 0       | 0       | 0   | --- | 0        | 0.00                       | 0.40 |
|                                       |              | HYG       | 0                                               | ---     | ---     | ---     | 0   | --- | 0        | 0.00                       | 0.85 |
|                                       |              | TCH       | ---                                             | ---     | ---     | ---     | --- | --- | ---      | ---                        | ---  |
|                                       | 5            | Plain     | 1                                               | 1       | 1       | 1       | 1   | --- | 8        | 0.93                       | 0.40 |
|                                       |              | HYG       | 0                                               | ---     | ---     | ---     | 0   | --- | 0        | 0.00                       | 0.85 |
|                                       |              | TCH       | ---                                             | ---     | ---     | ---     | --- | --- | ---      | ---                        | ---  |
| B <sub>25</sub> (5/7)                 | 1            | Plain     | Contam.                                         | 0       | 0       | 0       | --- | --- | 0        | 0.00                       | 0.48 |
|                                       |              | HYG       | 0                                               | ---     | ---     | ---     | --- | --- | 0        | 0.00                       | 0.85 |
|                                       |              | TCH       | ---                                             | ---     | ---     | ---     | --- | --- | ---      | ---                        | ---  |
|                                       | 2            | Plain     | 0                                               | 0       | 1       | 0       | --- | --- | 2        | 0.46                       | 0.40 |
|                                       |              | HYG       | 0                                               | ---     | ---     | ---     | --- | --- | 0        | 0.00                       | 0.85 |
|                                       |              | TCH       | ---                                             | ---     | ---     | ---     | --- | --- | ---      | ---                        | ---  |
|                                       | 3            | Plain     | 1                                               | 0       | 0       | 0       | --- | --- | 2        | 0.46                       | 0.40 |
|                                       |              | HYG       | 0                                               | ---     | ---     | ---     | --- | --- | 0        | 0.00                       | 0.85 |
|                                       |              | TCH       | ---                                             | ---     | ---     | ---     | --- | --- | ---      | ---                        | ---  |
|                                       | 4            | Plain     | 0                                               | 0       | 0       | 0       | --- | --- | 0        | 0.00                       | 0.40 |
|                                       |              | HYG       | 0                                               | ---     | ---     | ---     | --- | --- | 0        | 0.00                       | 0.85 |
|                                       |              | TCH       | ---                                             | ---     | ---     | ---     | --- | --- | ---      | ---                        | ---  |
|                                       | 5            | Plain     | 0                                               | 0       | 0       | 0       | --- | --- | 0        | 0.00                       | 0.40 |
|                                       |              | HYG       | 0                                               | ---     | ---     | ---     | --- | --- | 0        | 0.00                       | 0.85 |
|                                       |              | TCH       | ---                                             | ---     | ---     | ---     | --- | --- | ---      | ---                        | ---  |
| B <sub>8</sub> (5/7)                  | 1            | Plain     | 2                                               | 0       | 1       | Contam. | 0   | 0   | 8        | 0.93                       | 0.48 |
|                                       |              | HYG       | 0                                               | ---     | ---     | ---     | --- | --- | 0        | 0.00                       | 0.85 |
|                                       |              | TCH       | ---                                             | ---     | ---     | ---     | --- | --- | ---      | ---                        | ---  |
|                                       | 2            | Plain     | 1                                               | 0       | 1       | 0       | 0   | 0   | 4        | 0.68                       | 0.40 |
|                                       |              | HYG       | 0                                               | ---     | ---     | ---     | --- | --- | 0        | 0.00                       | 0.85 |
|                                       |              | TCH       | ---                                             | ---     | ---     | ---     | --- | --- | ---      | ---                        | ---  |
|                                       | 3            | Plain     | 0                                               | 0       | 0       | 2       | 0   | 0   | 4        | 0.68                       | 0.40 |
|                                       |              | HYG       | 0                                               | ---     | ---     | ---     | --- | --- | 0        | 0.00                       | 0.85 |
|                                       |              | TCH       | ---                                             | ---     | ---     | ---     | --- | --- | ---      | ---                        | ---  |
|                                       | 4            | Plain     | 0                                               | 0       | 0       | 0       | --- | --- | 0        | 0.00                       | 0.40 |
|                                       |              | HYG       | 0                                               | ---     | ---     | ---     | --- | --- | 0        | 0.00                       | 0.85 |
|                                       |              | TCH       | ---                                             | ---     | ---     | ---     | --- | --- | ---      | ---                        | ---  |
|                                       | 5            | Plain     | 0                                               | 0       | 4       | 3       | 0   | 0   | 13       | 1.15                       | 0.40 |
|                                       |              | HYG       | 0                                               | ---     | ---     | ---     | --- | --- | 0        | 0.00                       | 0.85 |
|                                       |              | TCH       | ---                                             | ---     | ---     | ---     | --- | --- | ---      | ---                        | ---  |

Continued on next page.

**Table S7, continued.**

| LTBI treatment regimen          | Mouse number | Agar type | CFU counts for the following 10-fold dilutions: |         |         |         |     | CFU/lung | Log <sub>10</sub> CFU/lung | LLOD |      |
|---------------------------------|--------------|-----------|-------------------------------------------------|---------|---------|---------|-----|----------|----------------------------|------|------|
|                                 |              |           | Undiluted                                       |         |         |         | 1   |          |                            |      | 2    |
|                                 |              |           | Plate 1                                         | Plate 2 | Plate 3 | Plate 4 |     |          |                            |      |      |
| B <sub>5.33</sub> (5/7)         | 1            | Plain     | 28                                              | 14      | 23      | 25      | 1   | ---      | 169                        | 2.23 | 0.40 |
|                                 |              | HYG       | 3                                               | ---     | ---     | ---     | 0   | 0        | 23                         | 1.37 | 0.85 |
|                                 |              | TCH       | 13                                              | ---     | ---     | ---     | 1   | 0        | 98                         | 1.99 | 0.85 |
|                                 | 2            | Plain     | 10                                              | 8       | 7       | 11      | --- | ---      | 68                         | 1.84 | 0.40 |
|                                 |              | HYG       | 1                                               | ---     | ---     | ---     | 0   | ---      | 8                          | 0.93 | 0.85 |
|                                 |              | TCH       | 2                                               | ---     | ---     | ---     | 1   | ---      | 15                         | 1.20 | 0.85 |
|                                 | 3            | Plain     | 29                                              | 17      | 16      | 14      | 2   | 0        | 143                        | 2.16 | 0.40 |
|                                 |              | HYG       | 0                                               | ---     | ---     | ---     | 0   | 0        | 0                          | 0.00 | 0.85 |
|                                 |              | TCH       | 14                                              | ---     | ---     | ---     | 2   | 0        | 105                        | 2.03 | 0.85 |
|                                 | 4            | Plain     | 12                                              | 8       | 11      | Contam. | --- | ---      | 78                         | 1.89 | 0.48 |
|                                 |              | HYG       | 1                                               | ---     | ---     | ---     | 0   | ---      | 8                          | 0.93 | 0.85 |
|                                 |              | TCH       | 10                                              | ---     | ---     | ---     | 1   | 0        | 75                         | 1.88 | 0.85 |
|                                 | 5            | Plain     | 15                                              | 13      | 12      | 7       | 1   | 0        | 88                         | 1.95 | 0.40 |
|                                 |              | HYG       | 0                                               | ---     | ---     | ---     | 0   | ---      | 0                          | 0.00 | 0.85 |
|                                 |              | TCH       | 14                                              | ---     | ---     | ---     | 1   | 0        | 105                        | 2.03 | 0.85 |
| B <sub>2.67</sub> (5/7)         | 1            | Plain     | 227                                             | 218     | ---     | ---     | 43  | 1        | 2 580                      | 3.41 | 0.60 |
|                                 |              | HYG       | 23                                              | ---     | ---     | ---     | 8   | 2        | 173                        | 2.24 | 0.85 |
|                                 |              | TCH       | +                                               | ---     | ---     | ---     | 30  | 2        | 1 800                      | 3.26 | 0.85 |
|                                 | 2            | Plain     | 190                                             | 107     | ---     | ---     | 27  | 2        | 1 620                      | 3.21 | 0.60 |
|                                 |              | HYG       | 52                                              | ---     | ---     | ---     | 5   | 0        | 390                        | 2.59 | 0.85 |
|                                 |              | TCH       | +                                               | ---     | ---     | ---     | 28  | 3        | 1 680                      | 3.23 | 0.85 |
|                                 | 3            | Plain     | 235                                             | 212     | ---     | ---     | 29  | 5        | 1 740                      | 3.24 | 0.60 |
|                                 |              | HYG       | 60                                              | ---     | ---     | ---     | 9   | 0        | 450                        | 2.65 | 0.85 |
|                                 |              | TCH       | +                                               | ---     | ---     | ---     | 44  | 5        | 2 640                      | 3.42 | 0.85 |
|                                 | 4            | Plain     | 201                                             | 207     | ---     | ---     | 48  | 4        | 2 880                      | 3.46 | 0.60 |
|                                 |              | HYG       | 44                                              | ---     | ---     | ---     | 6   | 0        | 330                        | 2.52 | 0.85 |
|                                 |              | TCH       | +                                               | ---     | ---     | ---     | 33  | 2        | 1 980                      | 3.30 | 0.85 |
|                                 | 5            | Plain     | 312                                             | 397     | ---     | ---     | 62  | 5        | 3 720                      | 3.57 | 0.60 |
|                                 |              | HYG       | 52                                              | ---     | ---     | ---     | 11  | 0        | 390                        | 2.59 | 0.85 |
|                                 |              | TCH       | +                                               | ---     | ---     | ---     | 51  | 3        | 3 060                      | 3.49 | 0.85 |
| B <sub>LAI-160</sub> (1/28) × 3 | 1            | Plain     | 1                                               | 4       | 3       | 4       | 0   | 0        | 23                         | 1.37 | 0.40 |
|                                 |              | HYG       | 1                                               | ---     | ---     | ---     | 0   | 0        | 8                          | 0.93 | 0.85 |
|                                 |              | TCH       | ---                                             | ---     | ---     | ---     | --- | ---      | ---                        | ---  | ---  |
|                                 | 2            | Plain     | 3                                               | 2       | 2       | 1       | 0   | 0        | 15                         | 1.20 | 0.40 |
|                                 |              | HYG       | 0                                               | ---     | ---     | ---     | 0   | 0        | 0                          | 0.00 | 0.85 |
|                                 |              | TCH       | ---                                             | ---     | ---     | ---     | --- | ---      | ---                        | ---  | ---  |
|                                 | 3            | Plain     | 1                                               | 2       | 1       | 2       | 0   | 0        | 11                         | 1.09 | 0.40 |
|                                 |              | HYG       | 0                                               | ---     | ---     | ---     | 0   | 0        | 0                          | 0.00 | 0.85 |
|                                 |              | TCH       | ---                                             | ---     | ---     | ---     | --- | ---      | ---                        | ---  | ---  |
|                                 | 4            | Plain     | 2                                               | 4       | 0       | 1       | 0   | 0        | 13                         | 1.15 | 0.40 |
|                                 |              | HYG       | 0                                               | ---     | ---     | ---     | 0   | 0        | 0                          | 0.00 | 0.85 |
|                                 |              | TCH       | ---                                             | ---     | ---     | ---     | --- | ---      | ---                        | ---  | ---  |
|                                 | 5            | Plain     | 4                                               | 6       | 3       | 3       | 1   | 0        | 30                         | 1.49 | 0.40 |
|                                 |              | HYG       | 0                                               | ---     | ---     | ---     | 0   | 0        | 0                          | 0.00 | 0.85 |
|                                 |              | TCH       | ---                                             | ---     | ---     | ---     | --- | ---      | ---                        | ---  | ---  |
| B <sub>LAI-160</sub> (1/28) × 2 | 1            | Plain     | 16                                              | 20      | 19      | 23      | 3   | 0        | 146                        | 2.17 | 0.40 |
|                                 |              | HYG       | 2                                               | ---     | ---     | ---     | 0   | 0        | 15                         | 1.20 | 0.85 |
|                                 |              | TCH       | 15                                              | ---     | ---     | ---     | 2   | 0        | 113                        | 2.05 | 0.85 |
|                                 | 2            | Plain     | 5                                               | 2       | 4       | 3       | 0   | 0        | 26                         | 1.44 | 0.40 |
|                                 |              | HYG       | 2                                               | ---     | ---     | ---     | 0   | 0        | 15                         | 1.20 | 0.85 |
|                                 |              | TCH       | 2                                               | ---     | ---     | ---     | 0   | 0        | 15                         | 1.20 | 0.85 |
|                                 | 3            | Plain     | 10                                              | 3       | 8       | 9       | 0   | 0        | 56                         | 1.76 | 0.40 |
|                                 |              | HYG       | 1                                               | ---     | ---     | ---     | 0   | 0        | 8                          | 0.93 | 0.85 |
|                                 |              | TCH       | 8                                               | ---     | ---     | ---     | 1   | 0        | 60                         | 1.79 | 0.85 |
|                                 | 4            | Plain     | 4                                               | 5       | 3       | 1       | 0   | 0        | 24                         | 1.40 | 0.40 |
|                                 |              | HYG       | 0                                               | ---     | ---     | ---     | 0   | 0        | 0                          | 0.00 | 0.85 |
|                                 |              | TCH       | 5                                               | ---     | ---     | ---     | 1   | 0        | 38                         | 1.59 | 0.85 |
|                                 | 5            | Plain     | 11                                              | 7       | 7       | 10      | 3   | ---      | 66                         | 1.82 | 0.40 |
|                                 |              | HYG       | 0                                               | ---     | ---     | ---     | 0   | 0        | 0                          | 0.00 | 0.85 |
|                                 |              | TCH       | 6                                               | ---     | ---     | ---     | 0   | 0        | 45                         | 1.66 | 0.85 |
| B <sub>LAI-160</sub> (1/28) × 1 | 1            | Plain     | 17                                              | 14      | 9       | 17      | 2   | 0        | 107                        | 2.03 | 0.40 |
|                                 |              | HYG       | 3                                               | ---     | ---     | ---     | 0   | 0        | 23                         | 1.37 | 0.85 |
|                                 |              | TCH       | 23                                              | ---     | ---     | ---     | 2   | 1        | 173                        | 2.24 | 0.85 |
|                                 | 2            | Plain     | 8                                               | 6       | 5       | 12      | 0   | 0        | 58                         | 1.77 | 0.40 |
|                                 |              | HYG       | 1                                               | ---     | ---     | ---     | 0   | 0        | 8                          | 0.93 | 0.85 |
|                                 |              | TCH       | 5                                               | ---     | ---     | ---     | 0   | 0        | 38                         | 1.59 | 0.85 |
|                                 | 3            | Plain     | 35                                              | 55      | 78      | Contam. | 12  | 0        | 420                        | 2.62 | 0.48 |
|                                 |              | HYG       | 26                                              | ---     | ---     | ---     | 6   | 0        | 195                        | 2.29 | 0.85 |
|                                 |              | TCH       | 60                                              | ---     | ---     | ---     | 11  | 1        | 450                        | 2.65 | 0.85 |
|                                 | 4            | Plain     | 8                                               | 8       | 4       | 6       | 1   | 0        | 49                         | 1.70 | 0.40 |
|                                 |              | HYG       | 3                                               | ---     | ---     | ---     | 0   | 0        | 23                         | 1.37 | 0.85 |
|                                 |              | TCH       | 8                                               | ---     | ---     | ---     | 1   | 0        | 60                         | 1.79 | 0.85 |
|                                 | 5            | Plain     | 6                                               | 9       | 7       | 6       | 0   | ---      | 53                         | 1.73 | 0.40 |
|                                 |              | HYG       | 0                                               | ---     | ---     | ---     | 0   | 0        | 0                          | 0.00 | 0.85 |
|                                 |              | TCH       | 3                                               | ---     | ---     | ---     | 1   | 0        | 23                         | 1.37 | 0.85 |

LLOD: lower limit of detection (log<sub>10</sub> CFU/lung). Contam. indicates bacterial or fungal contamination; this plate was not used to calculate CFU/lung. ++ indicates non-uniform confluent growth. + indicates individual colonies too numerous to accurately count or estimate.
